# Supplementary material for: Lung Adenocarcinoma Cells Respond Differently to Mechanical Stress in 3D Versus 2D Environments
Source: Research Square preprint supplement (doi:10.21203/rs.3.rs-6482124/v1), 2025-06-13
Supplement: Supplementary file 1 [file 5ed686cf6d540cbac5860c4d.xlsx]

## Sheet: Table 1
	Supplementary Table 1. Comparison of RNA concentrations between decellularised lungs and sample lungs
	Sample	RNA (ng/μl)	A260/280	A260/230
	Decellularised lung	1.45	2.7	0.1
	RM_1	116.7	2	2.1
	RM_2	602.3	2.1	2.31
	RM_3	327.9	2.1	2.2
	RM_4	170.6	2.1	1.4
	non-RM_1	111.1	2	2.2
	non-RM_2	317	2.1	2.3
	non-RM_3	618.2	2.1	2.2
	non-RM_4	210.4	2	1.2
	RM, Respiratory Motion
