# Supplementary material for: Lung Adenocarcinoma Cells Respond Differently to Mechanical Stress in 3D Versus 2D Environments
Source: Research Square preprint supplement (doi:10.21203/rs.3.rs-6482124/v1), 2025-06-13
Supplement: Supplementary file 2 [file 95262779642f4b3303db2ede.docx]

**Supplementary Information**

**Supplementary Figure 1. Decellularisation system and histological findings.**

(a, b) The lungs were placed in a beaker for decellularisation, and various solutions were gravity-fed through the tissues.

(c) Haematoxylin and eosin (HE) staining of a naïve lung. Scale bar indicates 100 μm.

(d) HE staining of a lung following decellularisation. All rat-derived cells were removed histologically, leaving only the structural framework that supports the alveoli. Scale bar indicates 100 μm.

**Supplementary Movie 1. Airway Reservoir Liquid Level Response to Ventilation**

Timelapse recording of the airway reservoir under respiratory motion. Expansion and contraction of the lung in response to intrachamber pressure changes cause the movement of approximately 10 mL of culture medium in and out of the reservoir.
